# Supplementary material
Source: publisher figshare collection journal article supplement (https://tandf.figshare.com/ndownloader/files/17337803)
Supplement: Supplementary file 1 [file 17337803]

Supplementary Table 6. Effects of bentonite addition and *A*. *sessilis* cultivation on residual PCBi concentrations (ng g-1) in the soil containing 400 ng ƩPCBi g-1 after 26 weeks of incubation.

| PCBi | without plant cultivation | | | With alternanthra cultivation | | |
| --- | --- | --- | --- | --- | --- | --- |
| **B0* (Control)** | **B2** | **B4** | **B0** | **B2** | **B4** |
| CB5 | 4.18 a | 3.73 a | 3.95 a | 2.83 b | 2.74 b | 2.18 c |
| CB18 | 4.69 a | 4.51 a | 4.56 a | 4.05 b | 3.62 b | 3.03 c |
| CB31 | 10.7 a | 11.0 a | 10.7 a | 7.52 b | 6.37 b | 4.18 c |
| CB44 | 6.88 a | 7.32 a | 6.63 a | 6.42 b | 5.15 c | 4.14 d |
| CB52 | 2.60 a | 2.19b | 2.40 a | 2.01 b | 1.66 c | 1.24 d |
| CB66 | 12.9 a | 12.7 a | 13.0 a | 8.80 b | 7.80 b | 6.42 c |
| CB87 | 37.8 a | 38.4 a | 37.6 a | 34.0 b | 23.5 c | 13.4 d |
| CB101 | 7.87 a | 7.12 a | 7.12 a | 4.55 b | 3.62 c | 2.55 d |
| CB110 | 19.1 a | 18.5 a | 18.2 a | 13.7 b | 10.7 c | 6.68 d |
| CB138 | 16.5 a | 16.7 a | 16.0 a | 14.7 b | 13.0c | 8.73 d |
| CB141 | 67.5 a | 65.5 a | 64.1 a | 36.3 b | 36.3 b | 19.8 c |
| CB151 | 14.2 a | 14.1 a | 13.8 a | 7.39 b | 5.79 c | 4.21 d |
| CB153 | 16.0 a | 16.3 a | 15.6 a | 14.0 b | 12.7 c | 9.74 d |
| CB170 | 19.6 a | 19.1 a | 19.5 a | 12.2 b | 10.3 c | 5.99 d |
| CB180 | 11.9 a | 11.5 a | 11.3 a | 6.26 b | 5.02 bc | 4.23 c |
| CB183 | 47.5 a | 45.4 a | 47.2 a | 28.6 b | 25.2 c | 16.5 d |
| CB187 | 25.0 a | 24.2 a | 24.5 a | 19.3 b | 16.9 c | 11.4 d |

Different letters in each row represent signiﬁcant differences with Tukey test (P< 0.05).

*: B0: 0% bentonite, B2: 2% bentonite, B4: 4% bentonite
